# Supplementary material
Source: MDPI journal article supplement (https://www.mdpi.com/2073-4441/15/3/467)
Supplement: s1 [file s1]

## Supplementary material S1

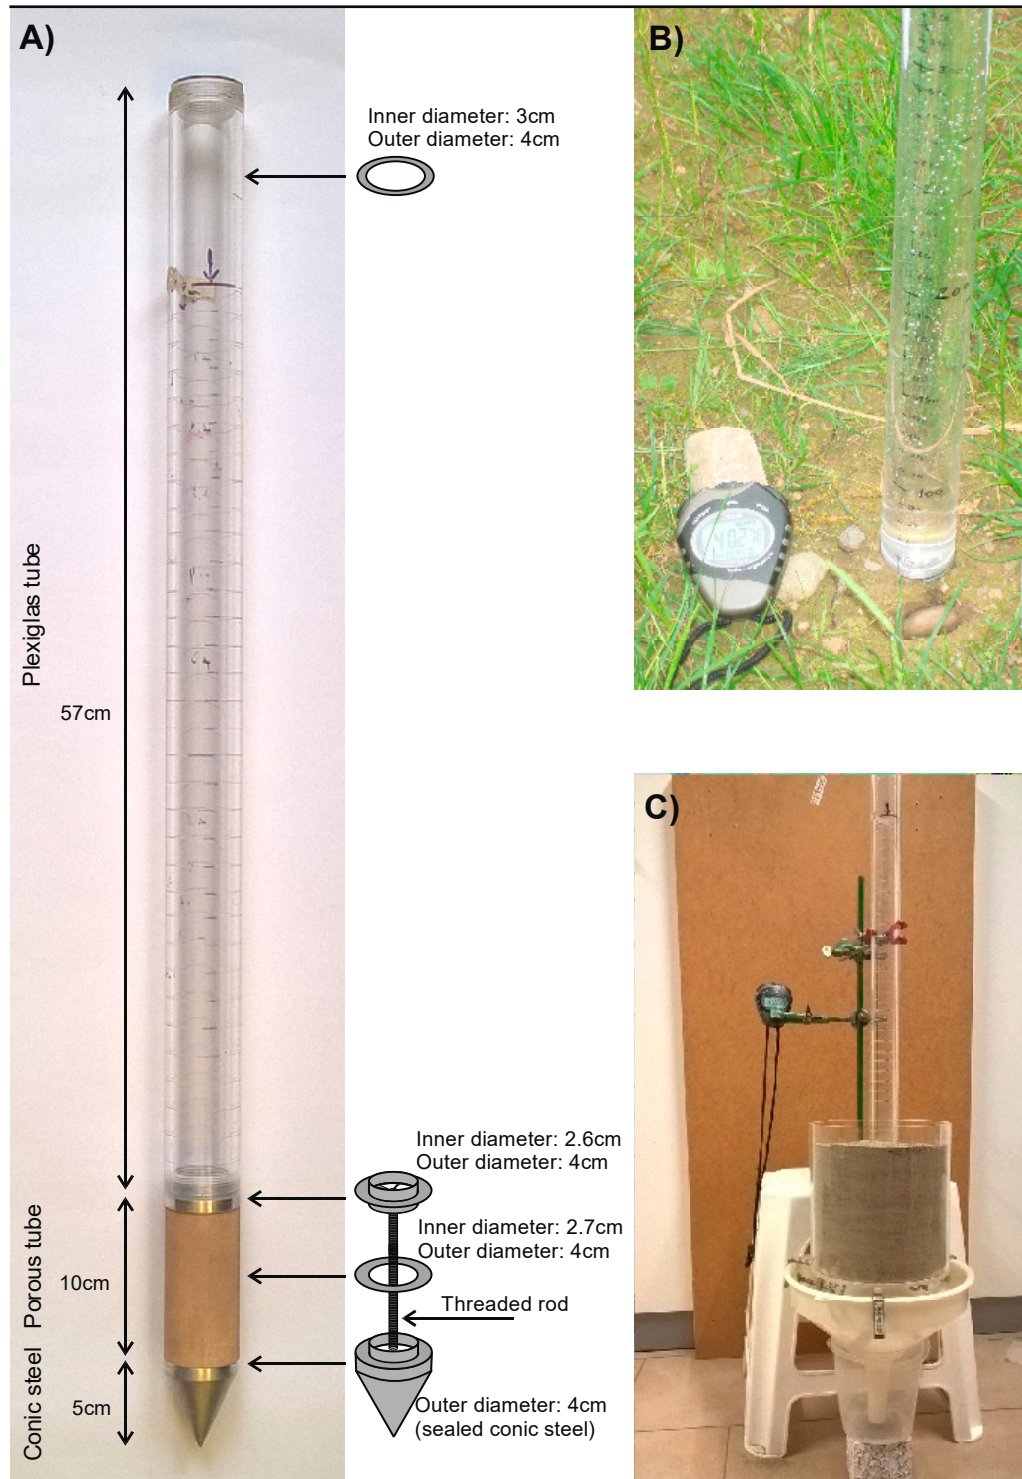

Experimental design; A) Infiltrometer device developed in this study; B) in situ infiltration experiments; and C) Laboratory experiments carried out on soil columns of 19 cm in diameter and 20 cm in height

## Supplementary Material S2

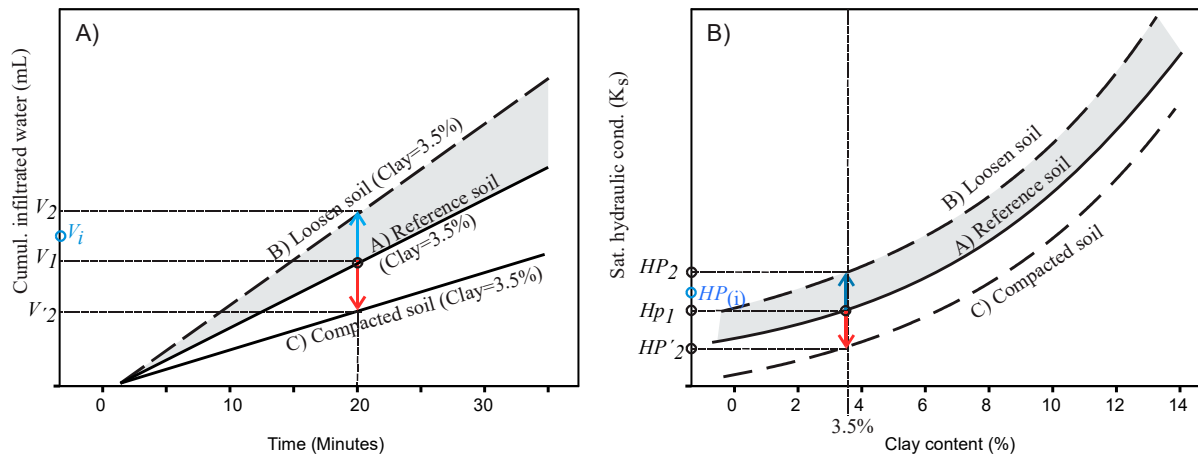

The method used for the calibration based on the relationships between cumulative infiltration and corresponding time obtained by means of our infiltrometer (A).  $V_1$ ,  $V_2$ , and  $V'_2$  are infiltrated water measured in reconstructed soil with exclusively mineral soil (reference soil), loosen soil, and compacted soil, respectively;  $HP_2$ ,  $HP_1$  and  $HP'_2$  are measured hydraulic properties of loosen, reference, and compacted soil, respectively (B);  $HP_{(i)}$  is unknown and can be derived from  $V_1$  using eq. 1 (see text for explanation)

## Supplementary Material S3

Statistics performed with S Plus Software (refer to Table 2)

| Clay | KsatMoy   | TetaSat     | Ksat       | Alpha       | n        | m        | mL     |
|------|-----------|-------------|------------|-------------|----------|----------|--------|
| 0.1  | 0.0010178 | 36.55430175 | 0.00061305 | 0.013583349 | 2.489663 | 0.598339 | 61.97  |
| 2.8  | 0.000584  | 38.94883549 | 0.00109577 | 0.019604805 | 2.06972  | 0.516843 | 73.14  |
| 3.5  | 0.001268  | 39.59484267 | 0.00127383 | 0.021561401 | 1.983286 | 0.495786 | 82.33  |
| 7.5  | 0.0032624 | 43.49730031 | 0.00301146 | 0.03713295  | 1.619885 | 0.382672 | 93.41  |
| 10.6 | 0.01222   | 46.78435603 | 0.00586636 | 0.056587873 | 1.453417 | 0.311966 | 121.77 |
| 13.6 | 0.008152  | 50.20169918 | 0.01118456 | 0.085071724 | 1.362386 | 0.265993 | 153.88 |

\*\*\* Nonlinear Regression Model \*\*\*

Formula:  $KsatMoy \sim K * \exp(0.2151 * Clay)$

Parameters:

numeric matrix: 1 rows, 3 columns.

|   | Value      | Std. Error  | t value |
|---|------------|-------------|---------|
| K | 0.00061324 | 0.000144724 | 4.23731 |

Residual standard error: 0.00316134 on 5 degrees of freedom

-----

\*\*\* Nonlinear Regression Model \*\*\*

Formula:  $TetaSat \sim K * \exp(0.024 * Clay)$

Parameters:

numeric matrix: 1 rows, 3 columns.

|   | Value   | Std. Error | t value |
|---|---------|------------|---------|
| K | 36.3336 | 0.0384148  | 945.821 |

Residual standard error: 0.110999 on 5 degrees of freedom

-----

\*\*\* Nonlinear Regression Model \*\*\*

Formula: Alpha ~ K \* exp(0.14 \* Clay)

Parameters:

numeric matrix: 1 rows, 3 columns.

|   | Value     | Std. Error   | t value |
|---|-----------|--------------|---------|
| K | 0.0127891 | 0.0000763049 | 167.605 |

Residual standard error: 0.000676332 on 5 degrees of freedom

-----

\*\*\* Nonlinear Regression Model \*\*\*

Formula: n ~ K \* exp(-0.04 \* Clay)

Parameters:

numeric matrix: 1 rows, 3 columns.

|   | Value   | Std. Error | t value |
|---|---------|------------|---------|
| K | 2.32998 | 0.0493405  | 47.2224 |

Residual standard error: 0.0969526 on 5 degrees of freedom

**Software Reference:** Axum 7 for Windows User's Guide, Insightful Corporation, Seattle, WA. United States.
